# Supplementary material for: Treatment of cationic red X-GRL in high-salt printing and dyeing wastewater by an electrocatalytic ozonation system: treatment efficiency and degradation mechanism
Source: Royal Society of Chemistry journal article supplement (doi:10.1039/d5ra00939a), 2025-01-01
Supplement: d5ra00939a1.pdf [file d5ra00939a1.pdf]

***Supporting Information***

**Treatment of cationic red X-GRL in high salt printing and dyeing wastewater by  
electrocatalytic ozonation system: treatment efficiency and degradation  
mechanism**

Zhiwei Shang<sup>a</sup>, Jing Zhu<sup>a,b</sup>, Guoyu Zhang<sup>a,b,···\*</sup>, Zhipeng Li<sup>a,b</sup>, Jiapeng Zhang<sup>a</sup>,  
Weirun Li<sup>b</sup>, Wenye Li<sup>a</sup>, Fanbo Zeng<sup>a</sup>, Shuyu Zhao<sup>a</sup>, Hong You<sup>a,b</sup>, ZhiPeng Li<sup>b</sup>

<sup>a</sup> School of Marine Science and Technology, Harbin Institute of Technology at Weihai,  
Weihai 264209, China;

<sup>b</sup> State Key Laboratory of Urban Water Resource and Environment, School of  
Environment, Harbin Institute of Technology, Harbin 150090, China;

\* Corresponding author:

Guoyu Zhang

Tel.: 0451-86283001

E-mail: guoyuzh@hit.edu.cn

Pages: 5, Text: 1, Figure: 2, Table: 1.

21 Text Captions:

22 Text S1. Detailed information of chemicals and materials.

23 Figure Captions:

24 Fig. S1. Reaction apparatus diagram for electrochemical generation of  $\text{H}_2\text{O}_2$ .

25 Fig. S2. Reaction apparatus diagram of the electrocatalytic ozonation system.

26 Table Captions:

27 Table S1. Main water quality indexes of the high salt printing and dyeing wastewater

28 used in this study.

29 **Text S1.** Detailed information of chemicals

30 The diameter of GAC particles was 1 mm, and length of that was 5-7mm.

31 Sodium hydroxide (NaOH), manganous nitrate ( $\text{Mn}(\text{NO}_3)_2$ ), magnesium nitrate  
32 ( $\text{Mg}(\text{NO}_3)_2$ ), titanous sulfate ( $\text{Ti}_2\text{SO}_4$ ), sodium chloride (NaCl), potassium  
33 hypermanganate ( $\text{KMnO}_4$ ), silver sulfate ( $\text{Ag}_2\text{SO}_4$ ), urea ( $\text{CH}_4\text{N}_2\text{O}$ ), ammonium  
34 ferrous sulfate ( $\text{Fe}(\text{NH}_4)_2 \cdot (\text{SO}_4)_2 \cdot 6\text{H}_2\text{O}$ ), mercury sulfate ( $\text{HgSO}_4$ ), were all of  
35 analytical grade from Macklin (Shanghai, China) and used as received without further  
36 treatment. Sulfuric acid ( $\text{H}_2\text{SO}_4$ ) were analytical grade from Beijing Chemical Industry  
37 Group Co., Ltd. (Beijing, China) and used as received. (Shanghai, China) and used as  
38 received without further treatment. Nitric acid ( $\text{HNO}_3$ ), hydrogen peroxide ( $\text{H}_2\text{O}_2$  30  
39 %) were obtained from Aladdin Reagent Co., Ltd. (Shanghai, China).

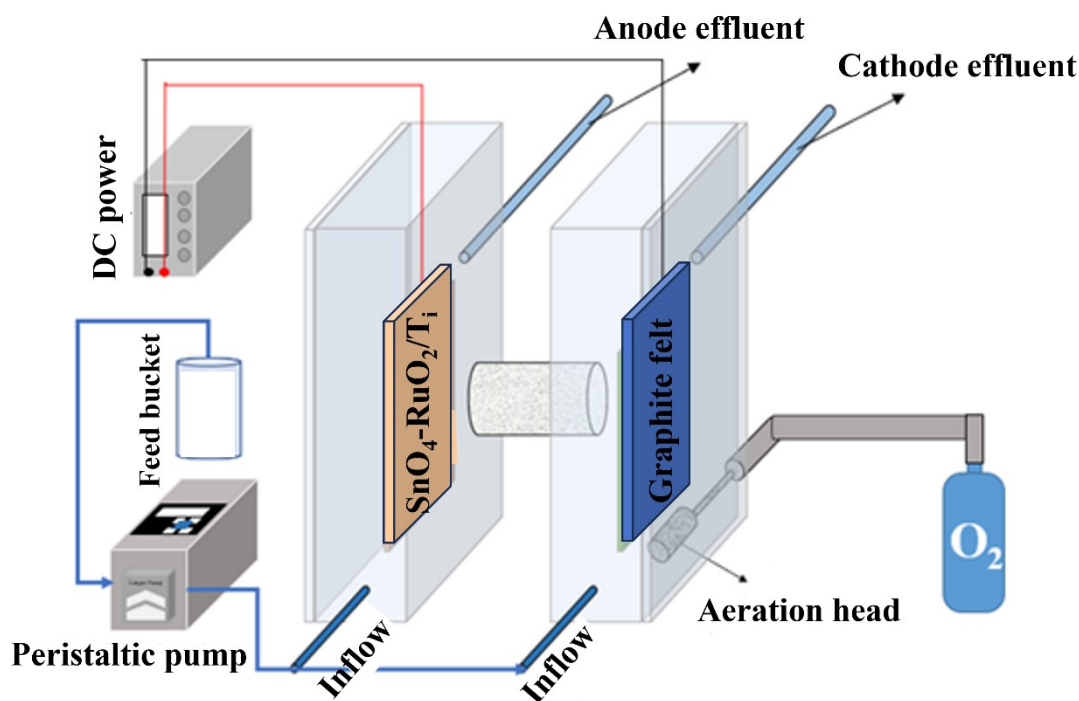

40

41 **Fig. S1.** Reaction apparatus diagram for electrochemical generation of  $\text{H}_2\text{O}_2$ .

42

43

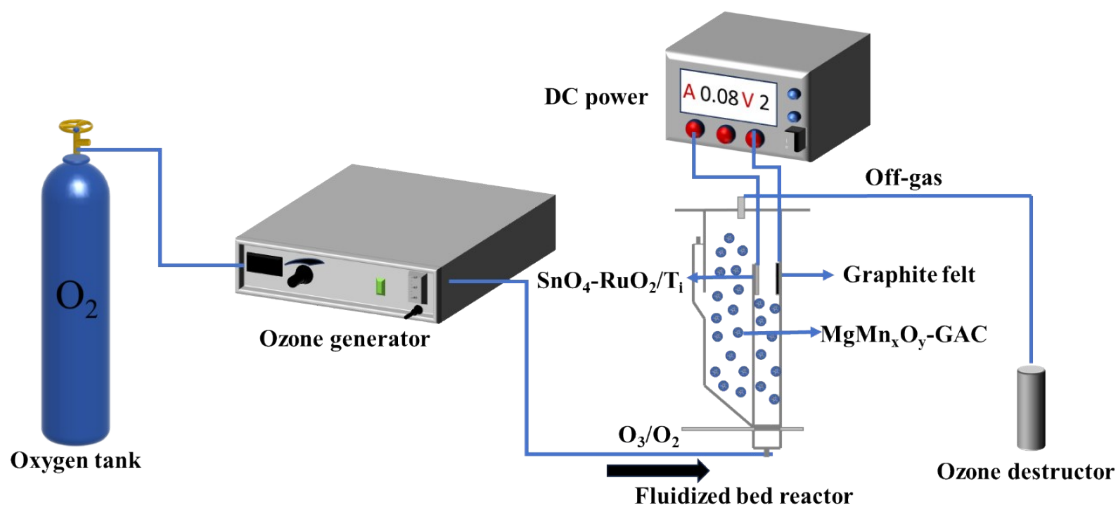

44

45

46 Fig. S2. Reaction apparatus diagram of the electrocatalytic ozonation system.

47 Table Captions:

48 Table S1. Main water quality indexes of the high salt printing and dyeing wastewater

49 used in this study.

| Content | pH  | NaCl<br>(g/L) | Temperatur<br>e<br>(°C) | Cationic red X-GRL<br>(mg/L) | COD<br>(mg/L) |
|---------|-----|---------------|-------------------------|------------------------------|---------------|
| Value   | 7-8 | 12            | 19-22                   | 160                          | 80            |

50
